# Supplementary material
Source: PubMed Central journal article supplement (PMC2268544)
Supplement: pnas_0710588105_1.pdf [file pnas_0710588105_1.pdf]

Amino acid sequence numbering  
and location of key sequences

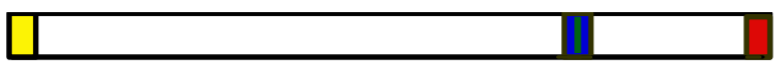

|                                                                                   |                            | Polypeptide chain designation |           |             | Sequence number |
|-----------------------------------------------------------------------------------|----------------------------|-------------------------------|-----------|-------------|-----------------|
|                                                                                   |                            | A                             | B         | C           |                 |
|  | N-telopeptide region       | 1 – 16                        | 1 – 8     | 1 – 14      |                 |
|  | Collagenase binding region | 782 – 809                     | 774 – 801 | 780 – 807   |                 |
|  | Collagenase cleavage site  | 791 – 792                     | 784 – 785 | 789 – 790   |                 |
|  | C-telopeptide region       | 1028 – 1054                   | 1022-1026 | 1026 – 1054 |                 |

Chain designation    polypeptide type

|   |            |
|---|------------|
| A | $\alpha$ 1 |
| B | $\alpha$ 2 |
| C | $\alpha$ 1 |

Chains A and C are identical but are staggered by the equivalent of 2 amino acid positions in relation to one another
