# Supplementary material
Source: PubMed Central journal article supplement (PMC2268544)

Collagenase cleavage-site obscured by C-telopeptide

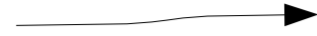

1.

Telopeptidase removes non-helical C-telopeptide

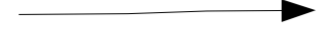

2.

“Collagenase Interaction Domain” (CID)

$\alpha 1$ :GAPGTPGPQGIAGQRGVVGLPGQRGERG

$\alpha 2$ :AGPPGPPGPQGLLGAPGFLGLPGSRGER

exposed to exterior of fibril

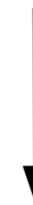

3.

Collagenase recognizes CID:

Hemopexin Domain ->RGER

Catalytic Domain -> G/L or G/I

5.

Cleavage at the G/L or G/I of each of the three chains sequentially

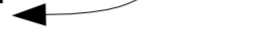

4.

Triple-Helix Unwound

(CID unwound / disassociated state stabilized)

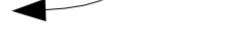

6.

Enzymatic / spontaneous removal of C-terminal part of molecule cleaved in step (5), uncovers CID in the D-period C-terminal to the prior proteolysis

**N → C collagenolysis**

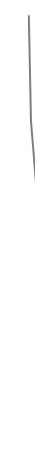

7.

After the N-C terminal cleavages have 'loosened' the matrix by making a prior pass of a neighboring microfibril, the alpha 1 peptide of CID becomes exposed, therefore possible

**C → N collagenolysis**

may occur, although it is equally likely that N → C collagenolysis would continue from these sites. Because the C-telopeptide is still intact and the alpha 2 chain is still obscured, this reaction pathway is likely to be significantly slower than that which follows directly from C-telopeptide cleavage or removal (1 or 6)

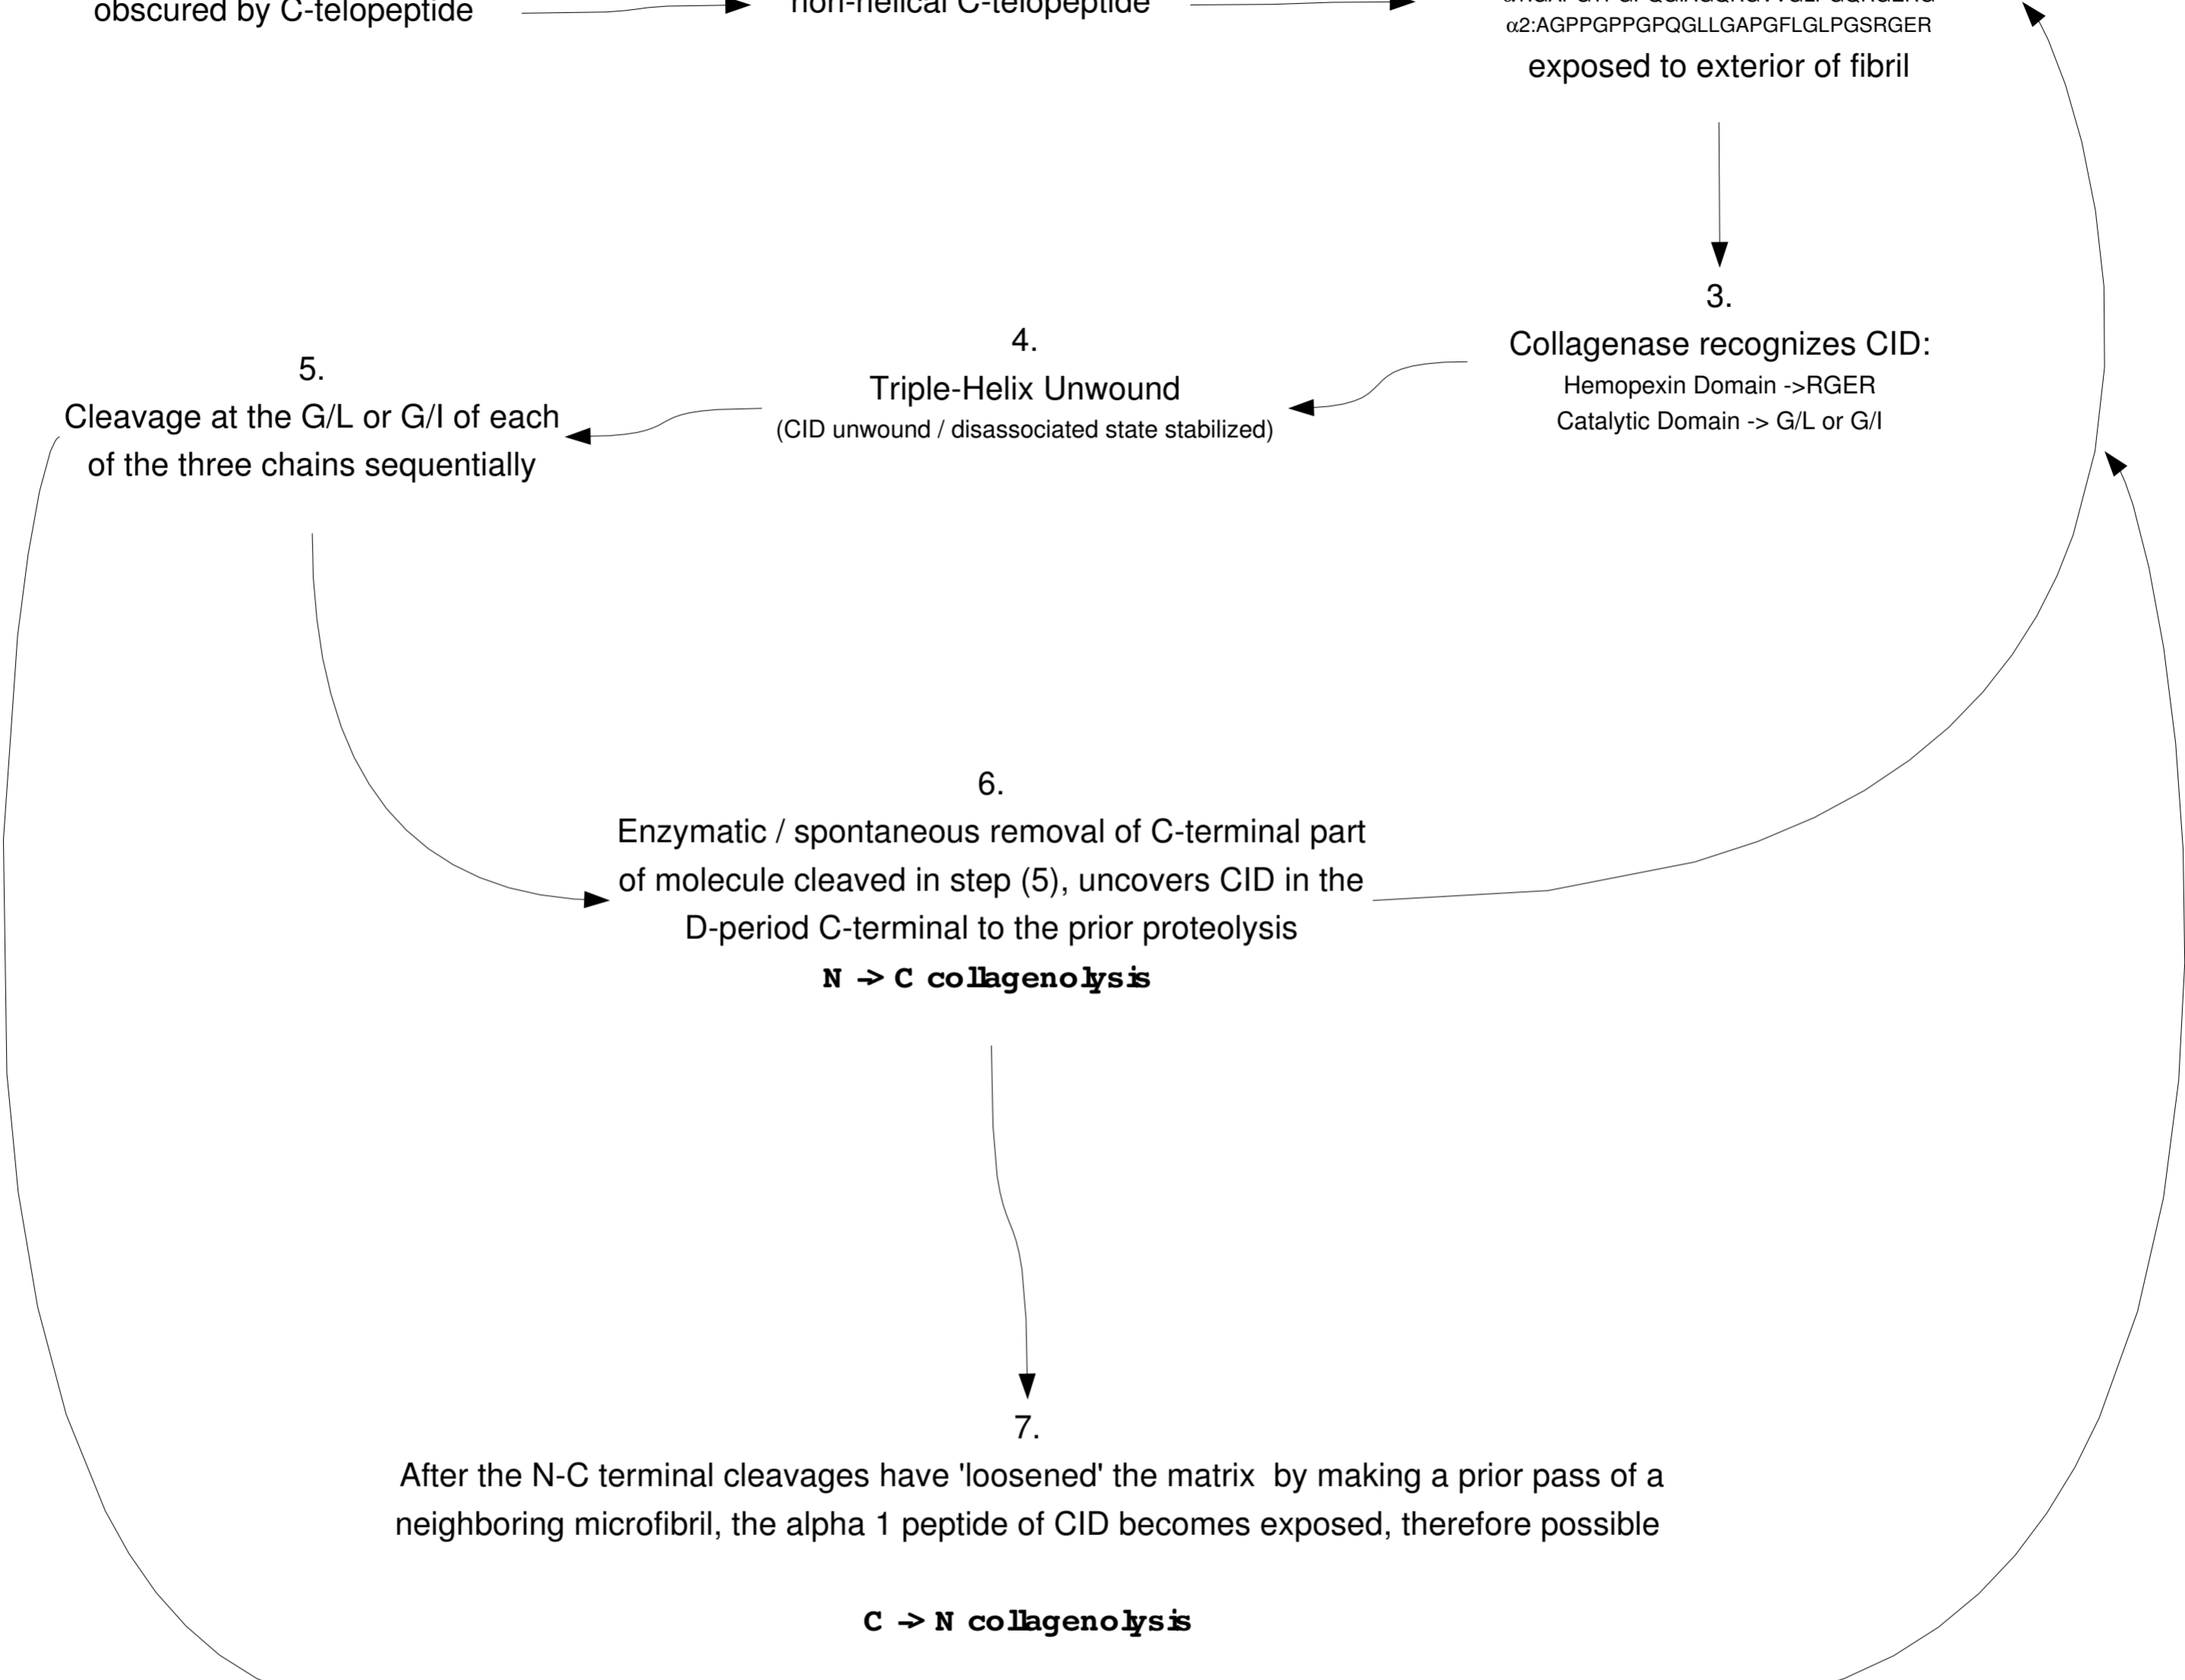

Supplement: pnas_0710588105_3.pdf [file pnas_0710588105_3.pdf]
