# Supplementary material
Source: PubMed Central journal article supplement (PMC2268544)

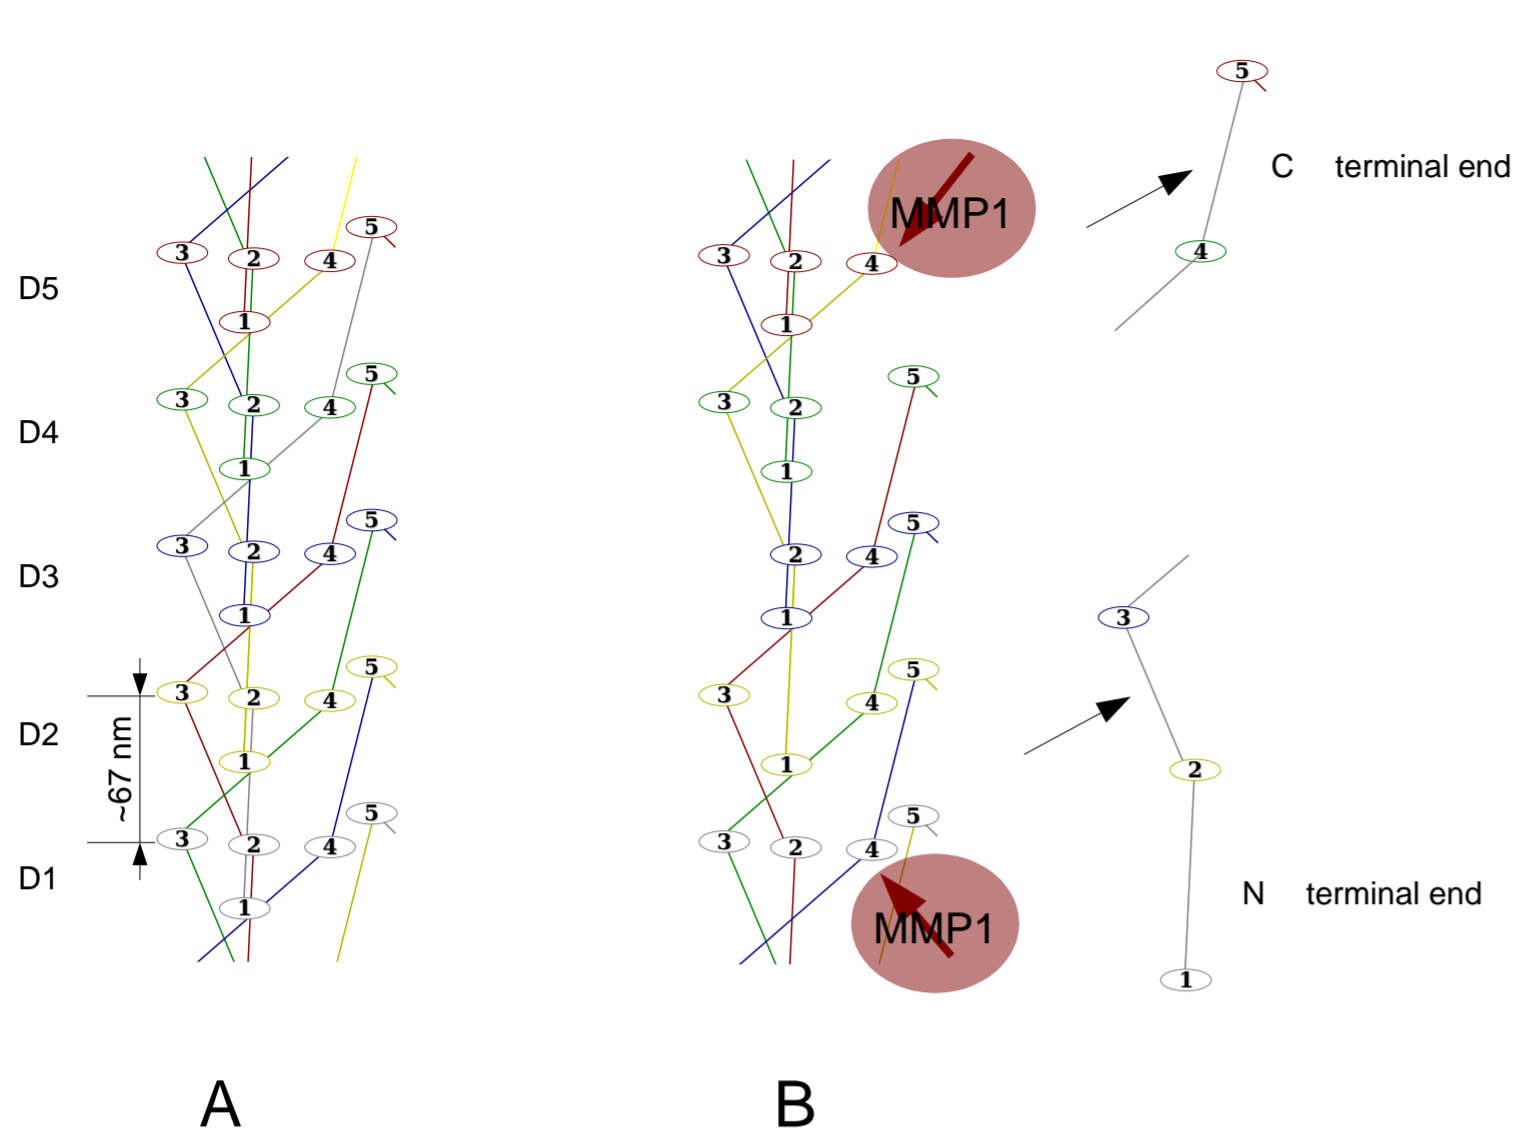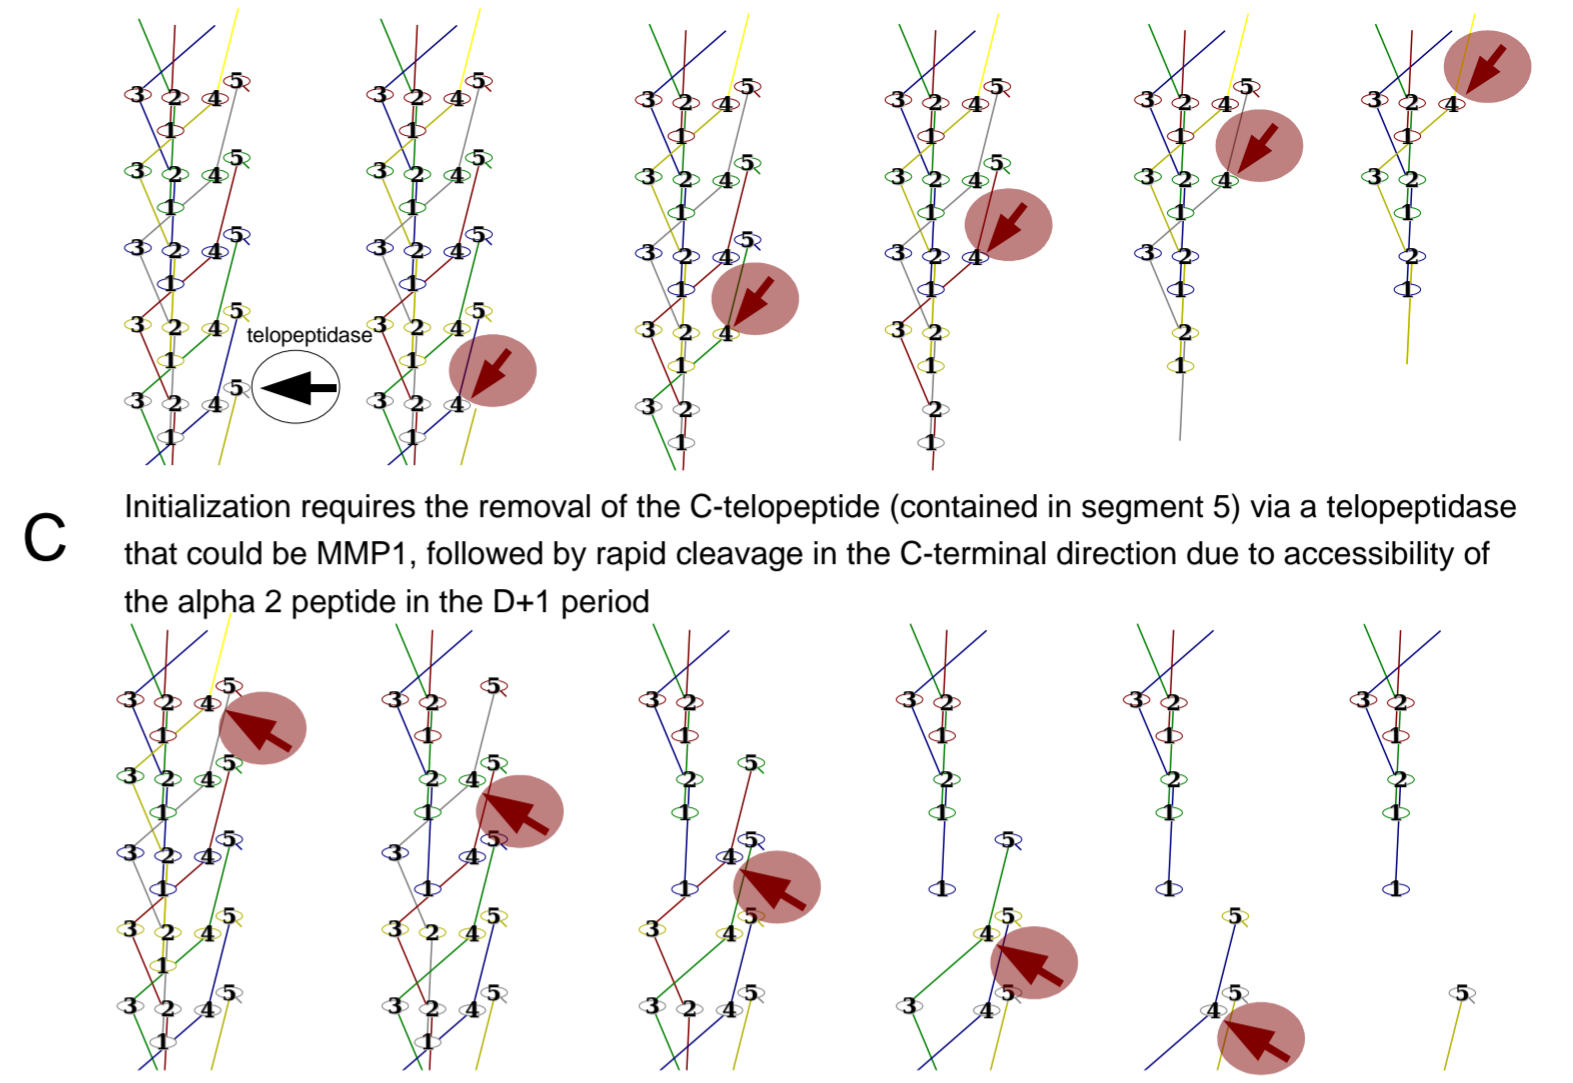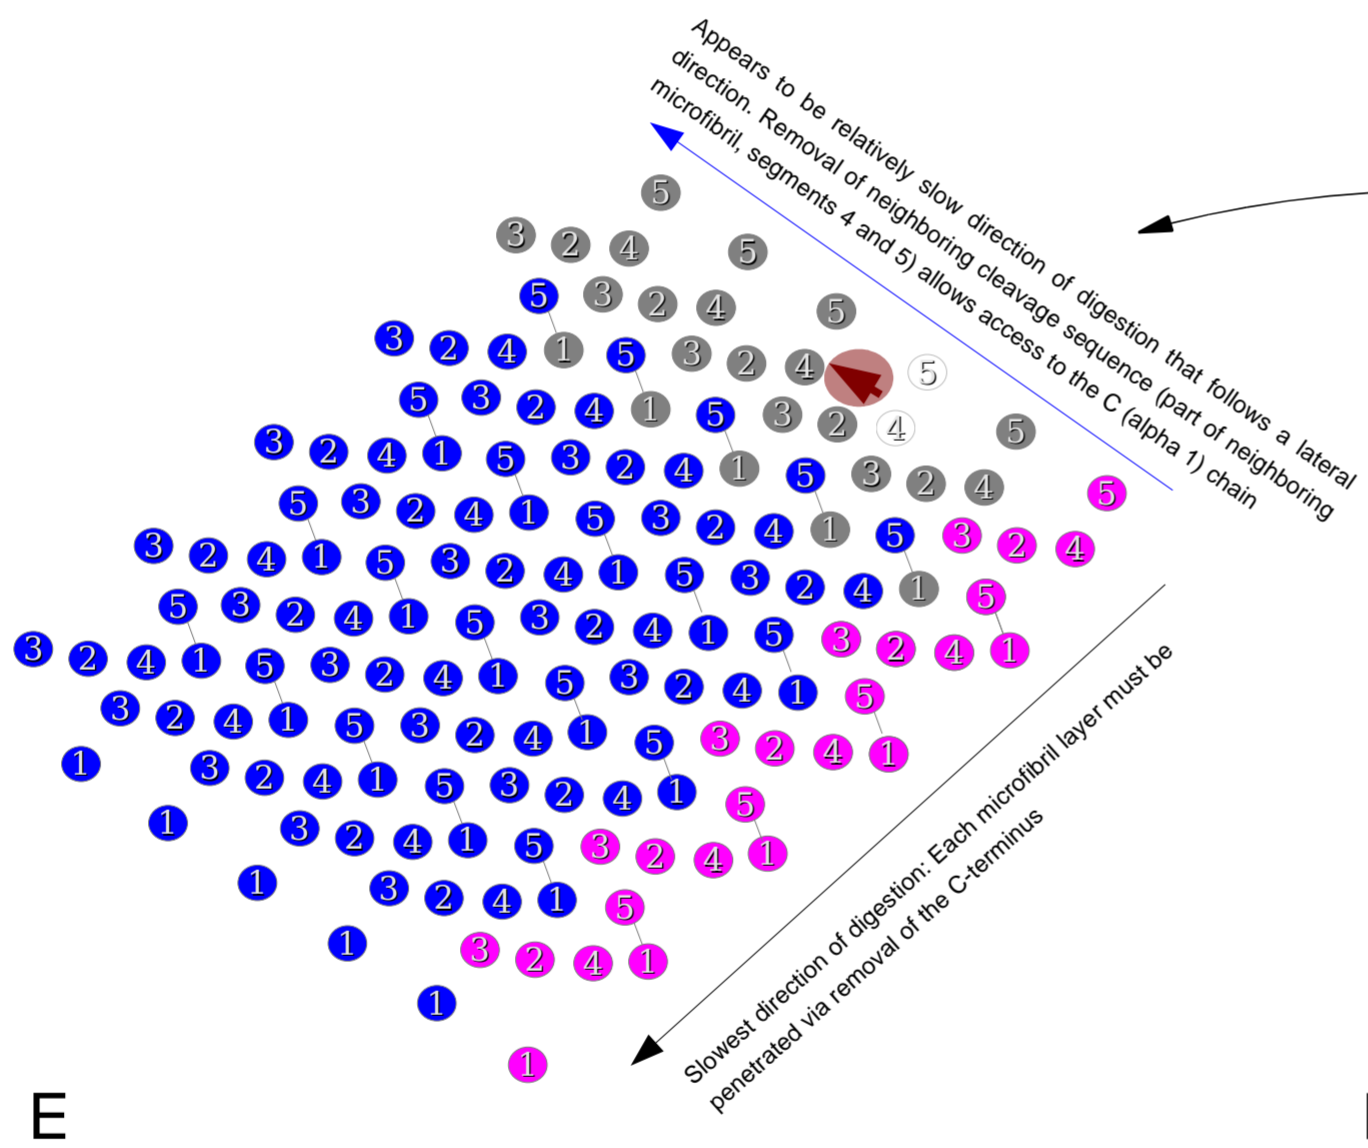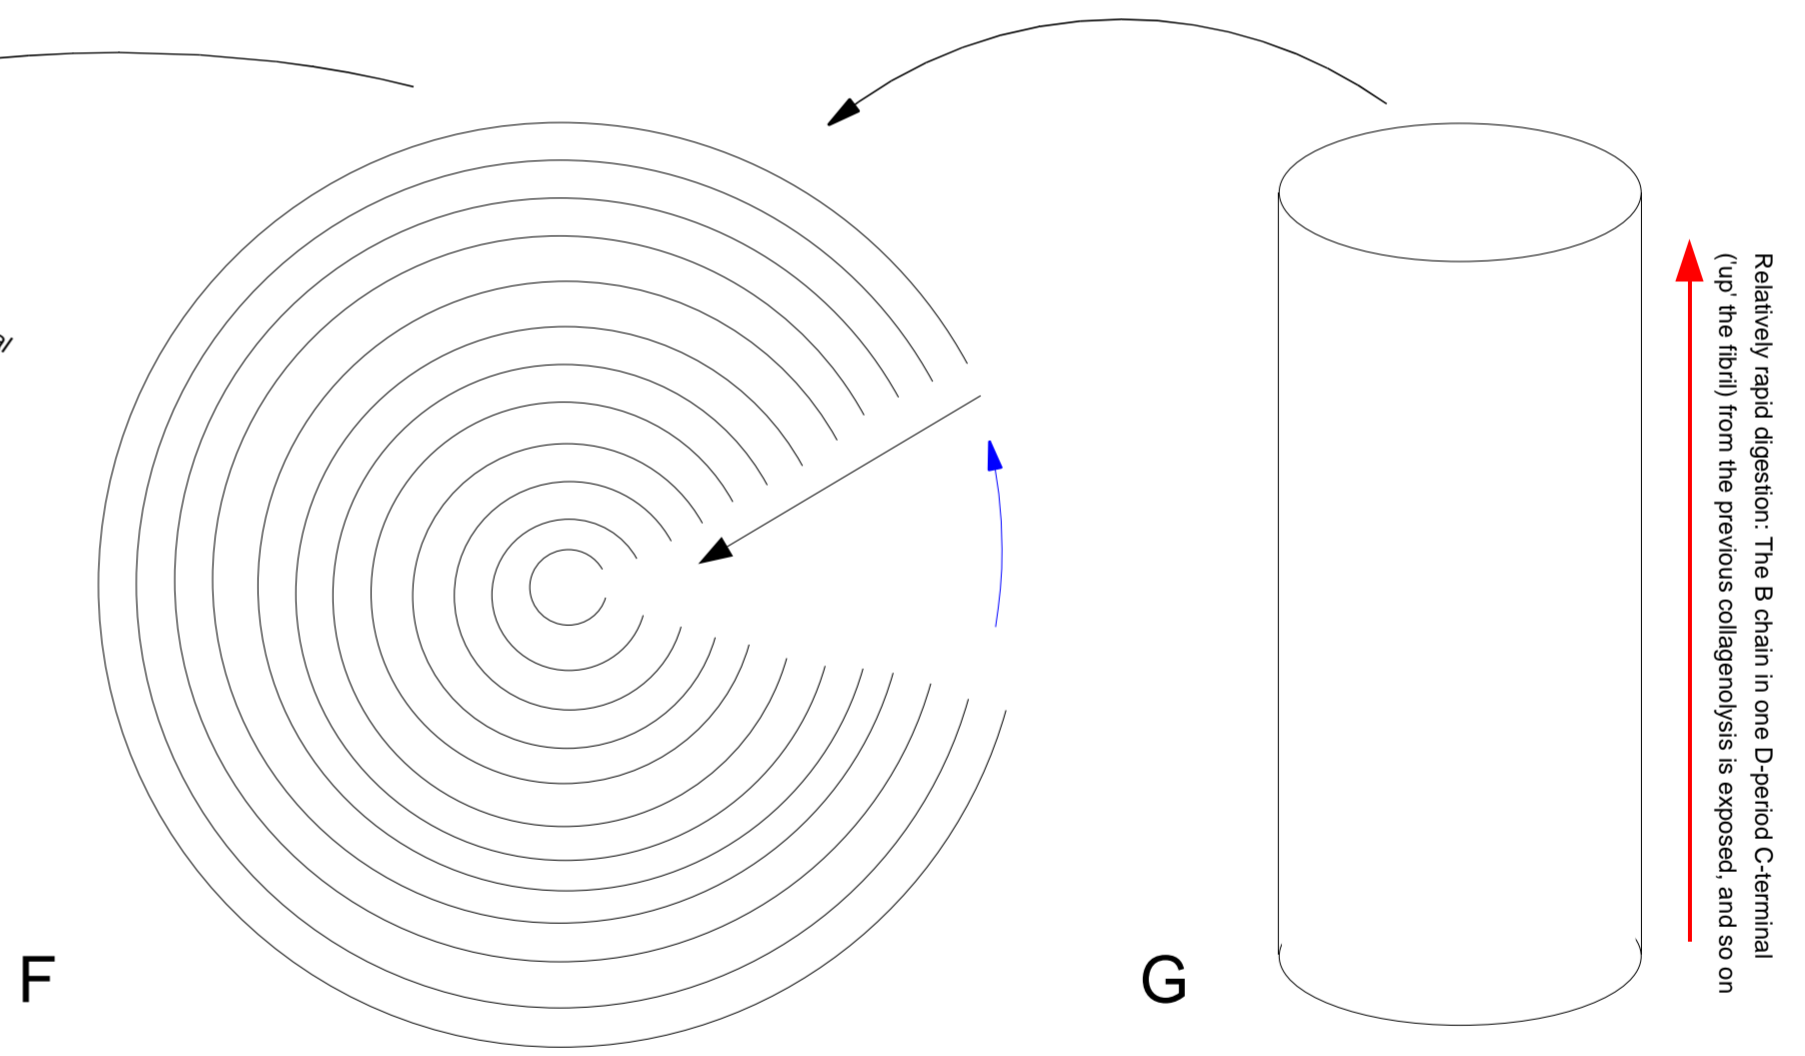

Supplement: pnas_0710588105_2.pdf [file pnas_0710588105_2.pdf]

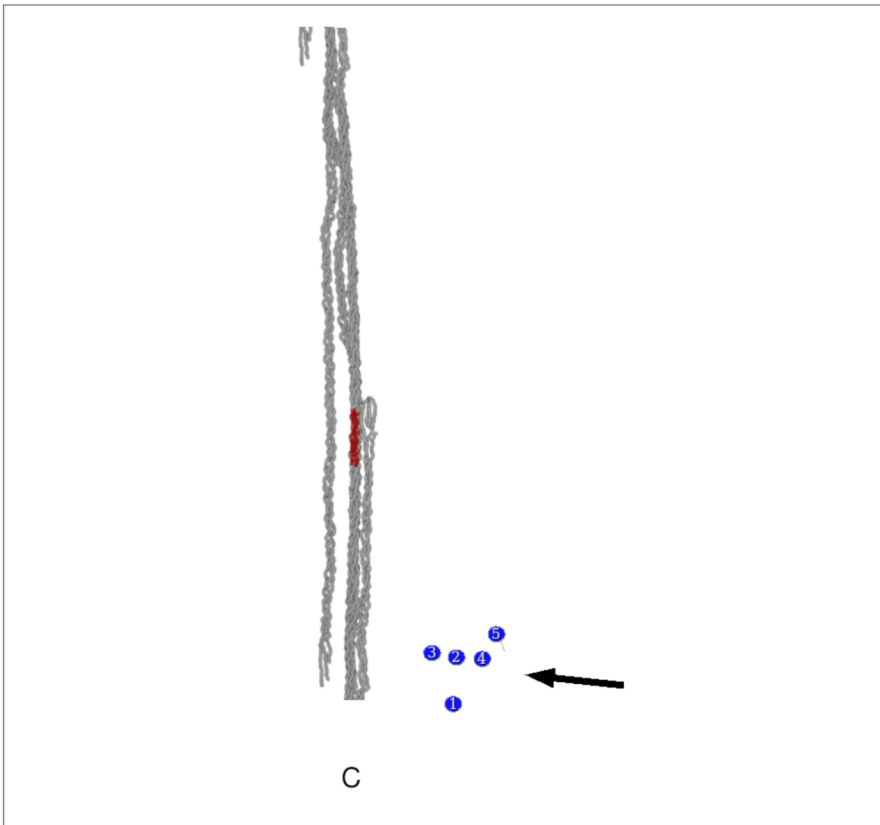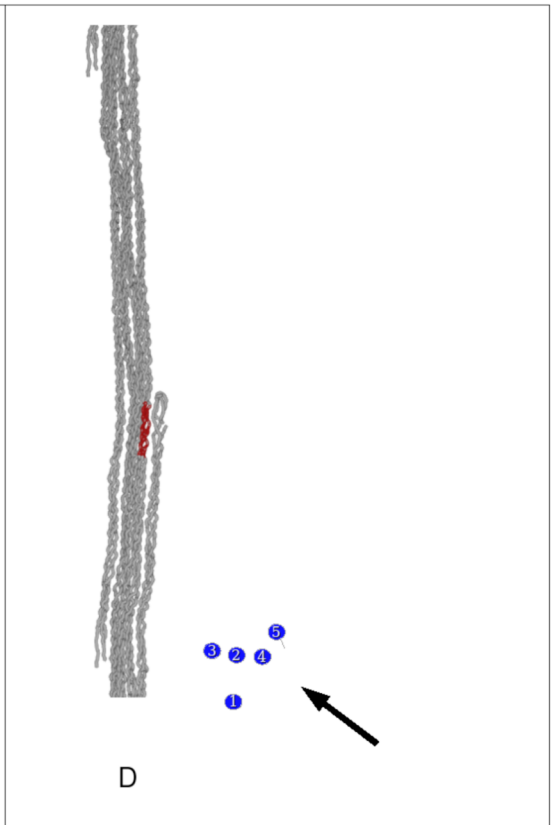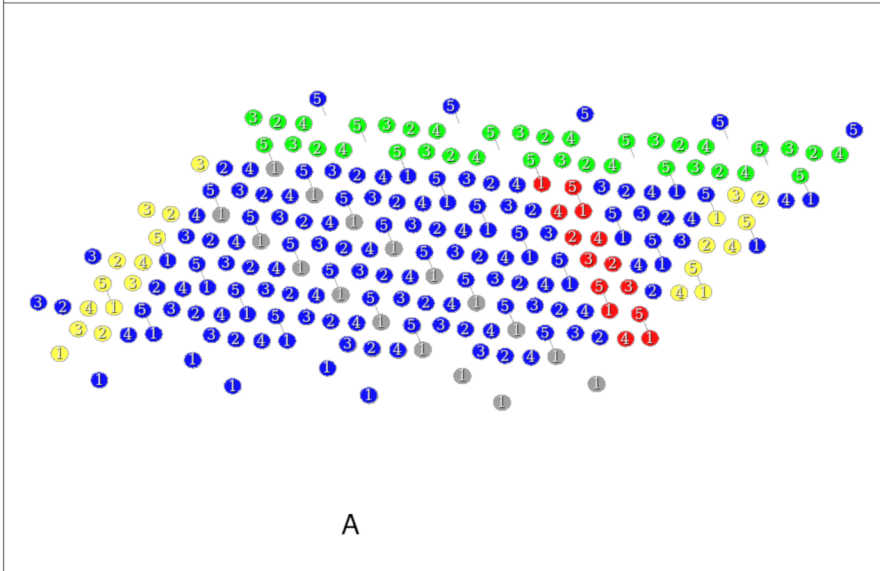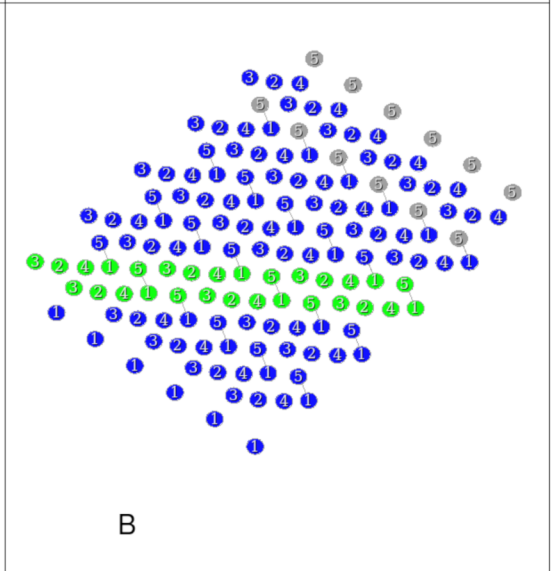

Supplement: pnas_0710588105_4.pdf [file pnas_0710588105_4.pdf]
